# Supplemental Figure 5 – Model Parameter Flexibility

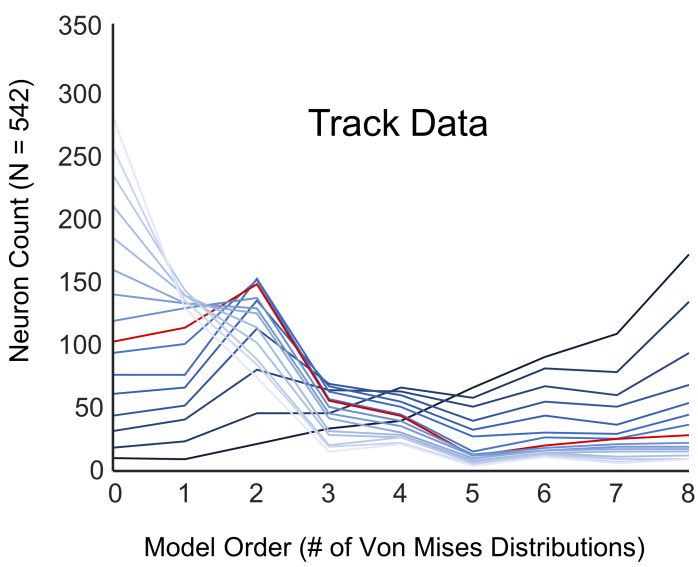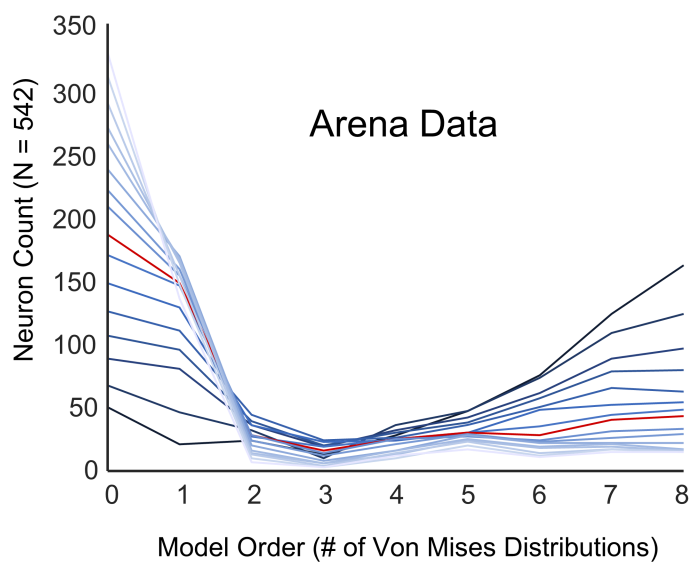

Source: https://www.biorxiv.org/content/biorxiv/suppl/2016/04/27/050641.DC1/050641-5.pdf
